# Supplementary material for: Environmentally friendly regeneration of graphite from spent lithium-ion batteries for sustainable anode material reuse
Source: Royal Society of Chemistry journal article supplement (doi:10.1039/d4ta07618d), 2025-01-01
Supplement: d4ta07618d1.pdf [file d4ta07618d1.pdf]

## Supporting Information

# Environmentally Friendly Regeneration of Graphite from Spent Lithium-Ion Batteries for Sustainable Anode Material Reuse

*Subramanian Natarajan,<sup>a,b1</sup> Tomotaro Mae,<sup>a</sup> Heng Yi Teah,<sup>b,c</sup> Hiroki Sakurai,<sup>a</sup> Suguru Noda<sup>a,b2</sup>*

<sup>a</sup>Department of Applied Chemistry, Waseda University, 3-4-1 Okubo, Shinjuku-ku, Tokyo, 169-8555, Japan

<sup>b</sup>Waseda Research Institute for Science and Engineering, Waseda University, 3-4-1 Okubo, Shinjuku-ku, Tokyo,  
169-8555, Japan

<sup>c</sup>Presidential Endowed Chair for "Platinum Society", The University of Tokyo, 7-3-1, Hongo, Bunkyo-ku, Tokyo,  
113-8656, Japan

---

<sup>1</sup> Corresponding author mail id: [natarajan@aoni.waseda.jp](mailto:natarajan@aoni.waseda.jp); [smnatarajan90@gmail.com](mailto:smnatarajan90@gmail.com)

<sup>2</sup> Corresponding author mail id: [noda@waseda.jp](mailto:noda@waseda.jp)

**Table S1: Metal contents of Gr-W and metal recovery rates from Gr-W to various solutions via the three regeneration processes.**

| Code                                | Element concentration (mg-metal/g-Gr-W) |      |      |      |      |      |
|-------------------------------------|-----------------------------------------|------|------|------|------|------|
|                                     | Al                                      | Co   | Cu   | Fe   | Li   | Ni   |
| <b>Gr-W<sup>a</sup></b>             | 0.04                                    | 0.04 | 0.36 | 0.08 | 3.54 | 0.01 |
| <b>Gr-AcOH<sup>b</sup></b>          | 0.02                                    | 0    | 0.02 | 0    | 3.47 | 0    |
| <b>Gr-KOH<sup>c</sup></b>           | 0                                       | 0    | 0.02 | 0    | 2.96 | 0    |
| <b>Gr-N<sub>2</sub><sup>c</sup></b> | 0                                       | 0    | 0    | 0    | 0.51 | 0    |

**a. Metal contents of the Gr-W particles.**

**b. Metals recovered in the AcOH solution used for lixiviation.**

**c. Metals recovered in the deionized water used for washing.**

**ICP-OES sample preparation:**

**Gr-W** (0.2 g) was treated with concentrated nitric acid (HNO<sub>3</sub>, 60%, 5 mL) in a microwave oven for 45 min. The solution was then filtered and aqueous nitric acid solution (1%, 1 mL) was added. Subsequently, the solution was diluted to 100 mL with water and analyzed by ICP-OES to quantify the concentration of the metal ions.

**Gr-AcOH** was prepared by leaching Gr-W with acetic acid, and the solution was separated from the graphite sample by filtration and diluted water to 100 mL. Additionally, nitric acid (HNO<sub>3</sub>, 15.7 M, 0.7 mL) was added to the solution for subsequent ICP-OES analysis.

**Gr-KOH** was prepared by leaching Gr-W with KOH, and the KOH solution was separated from the graphite sample by filtration. After heating the graphite sample at 800 °C under N<sub>2</sub> flow, deionized water (100 mL) was added, stirred, and filtrated, and the filtrate was neutralized with nitric acid (HNO<sub>3</sub>, 3 mL) and then diluted with water to 100 mL. Additionally, 0.7 mL of 15.7 M HNO<sub>3</sub> (0.7 mL, 15.7 M) was added to the solution to enable the quantification of metal concentrations via ICP-OES.

**Gr-N<sub>2</sub>** was prepared by heating Gr-W at 800 °C under N<sub>2</sub> flow. Water (3 mL) was added to Gr-N<sub>2</sub> to dissolve lithium present in the graphite sample, and the mixture was filtered. Subsequently, the filtrate was diluted with water to 100 mL, and HNO<sub>3</sub> (0.7 mL, 15.7 M) was subsequently added to prepare the solution for ICP-OES.

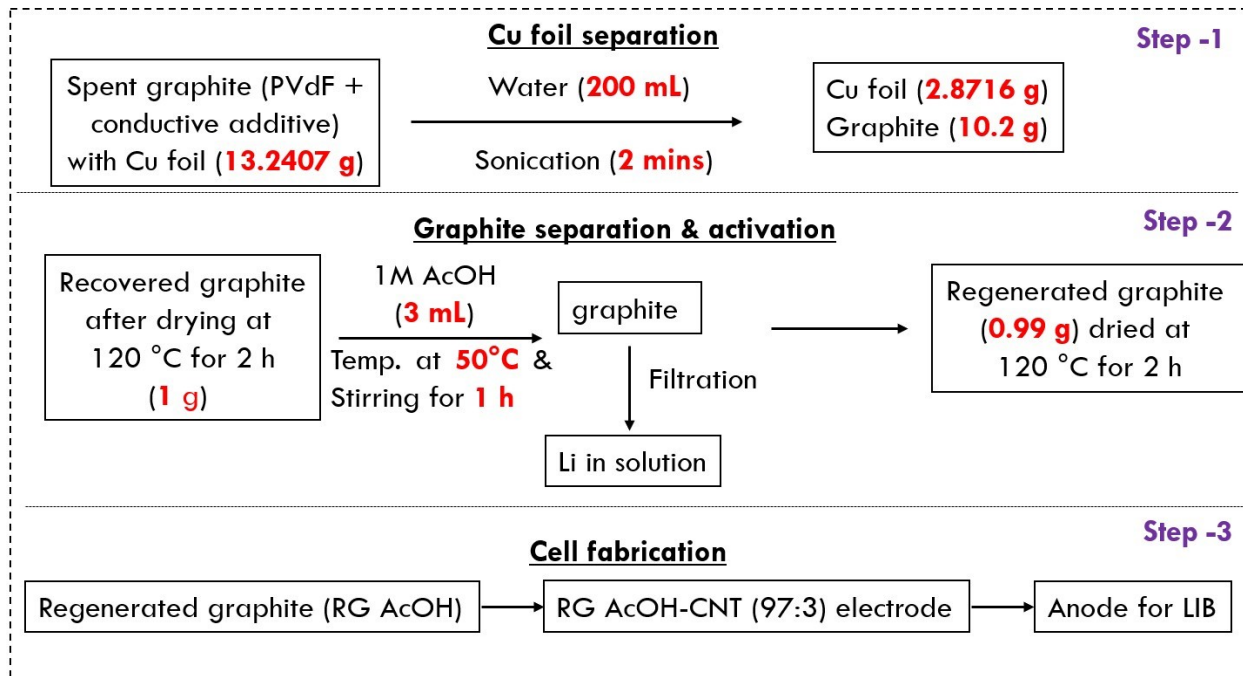

**Figure S1:** Flow chart for graphite regeneration by the acid lixiviation process (Gr-AcOH).

### Energy Consumption of the acid lixiviation (Gr-AcOH) process

#### Heating

Hot plate at 50 °C for 1 h = 0.01 kWh kg<sub>gr</sub><sup>-1</sup> (actual power)

#### Drying:

120 °C for 2 h = 0.34 kWh kg<sub>gr</sub><sup>-1</sup> (actual power)

Total energy consumption = 0.01 kWh kg<sub>gr</sub><sup>-1</sup> + 0.34 kWh kg<sub>gr</sub><sup>-1</sup>

Total energy consumption = 0.351 kW.h kg<sub>gr</sub><sup>-1</sup>

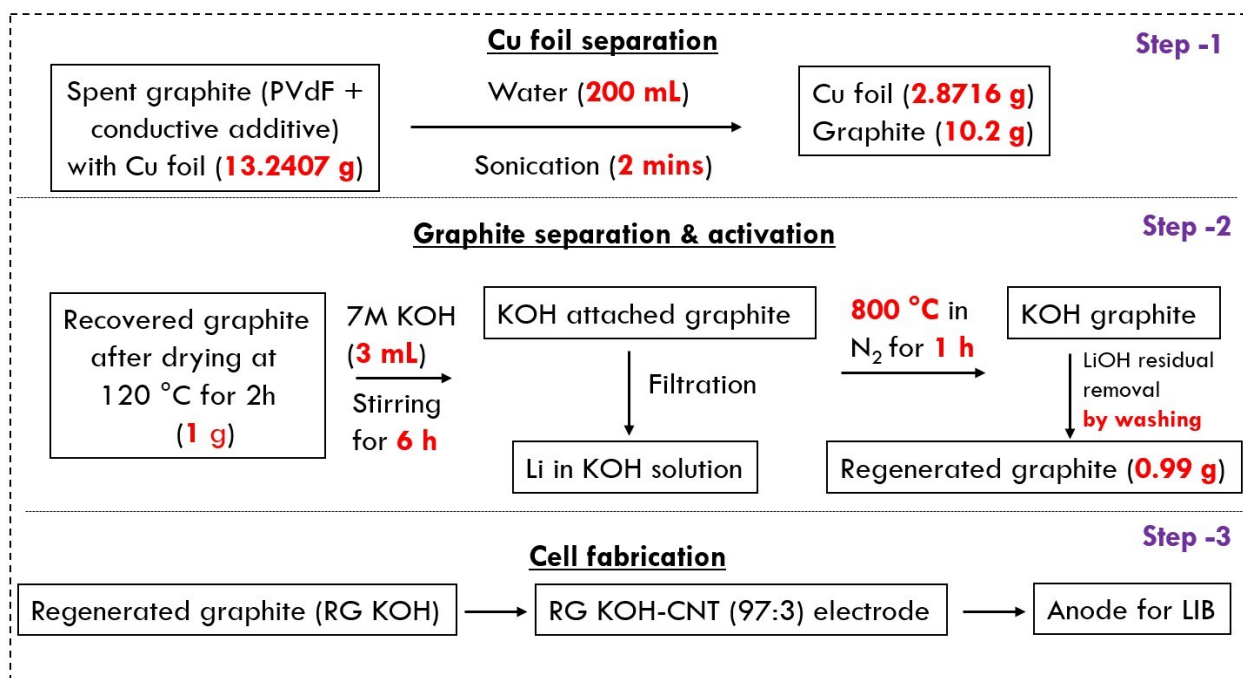

**Figure S2:** Flow chart of graphite regeneration by the alkali lixiviation technique (Gr-KOH) followed by heat treatment.

**Energy Consumption of the alkali lixiviation process followed by heat treatment (Gr-KOH)**

**Stirring:**

Stirring for 6 h = 0.01 kW.h kg<sub>gr</sub><sup>-1</sup> (actual power)

**Drying:**

120 °C for 2 h (using 1 g graphite) = 0.34 kW.h kg<sub>gr</sub><sup>-1</sup> (actual power)

**Annealing:**

Annealed at 800 °C for 1 h (using 1 g of sample) = 0.57 kWh kg<sub>gr</sub><sup>-1</sup> (actual power)

Total energy consumption = 0.34 kW h kg<sub>gr</sub><sup>-1</sup> + 0.57 kWh kg<sub>gr</sub><sup>-1</sup>

Total energy consumption = 0.91 kWh kg<sub>gr</sub><sup>-1</sup>

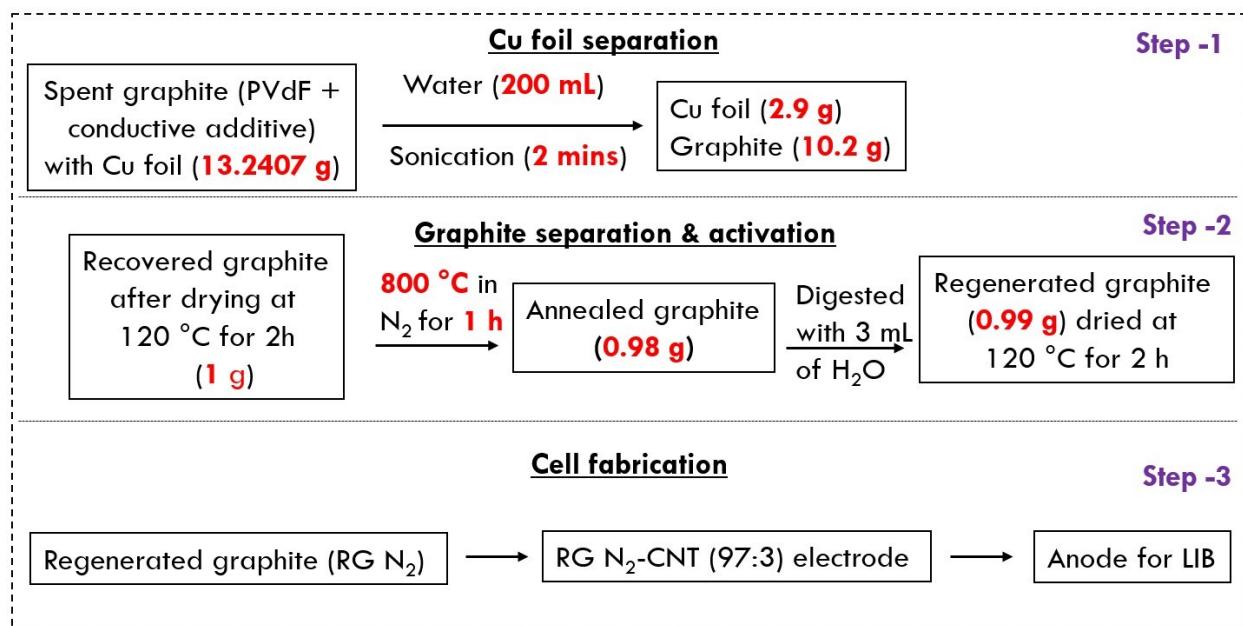

**Figure S3:** Flow chart of graphite regeneration by gas treatment with annealing (Gr-N<sub>2</sub>) followed by lixiviation.

### Energy Consumption of thermal treatment under N<sub>2</sub> followed by lixiviation (Gr-N<sub>2</sub>)

#### Drying:

120 °C for 2 h (using 1 g graphite) = 0.34 kWh kg<sub>gr</sub><sup>-1</sup> (actual power)

#### Annealing:

Annealed at 800 °C for 1 h (using 1 g graphite) = 0.57 kWh kg<sub>gr</sub><sup>-1</sup> (actual power)

Total energy consumption = 0.34 kWh kg<sub>gr</sub><sup>-1</sup> + 0.57 kWh kg<sub>gr</sub><sup>-1</sup>

Total energy consumption = 0.91 kWh kg<sub>gr</sub><sup>-1</sup>

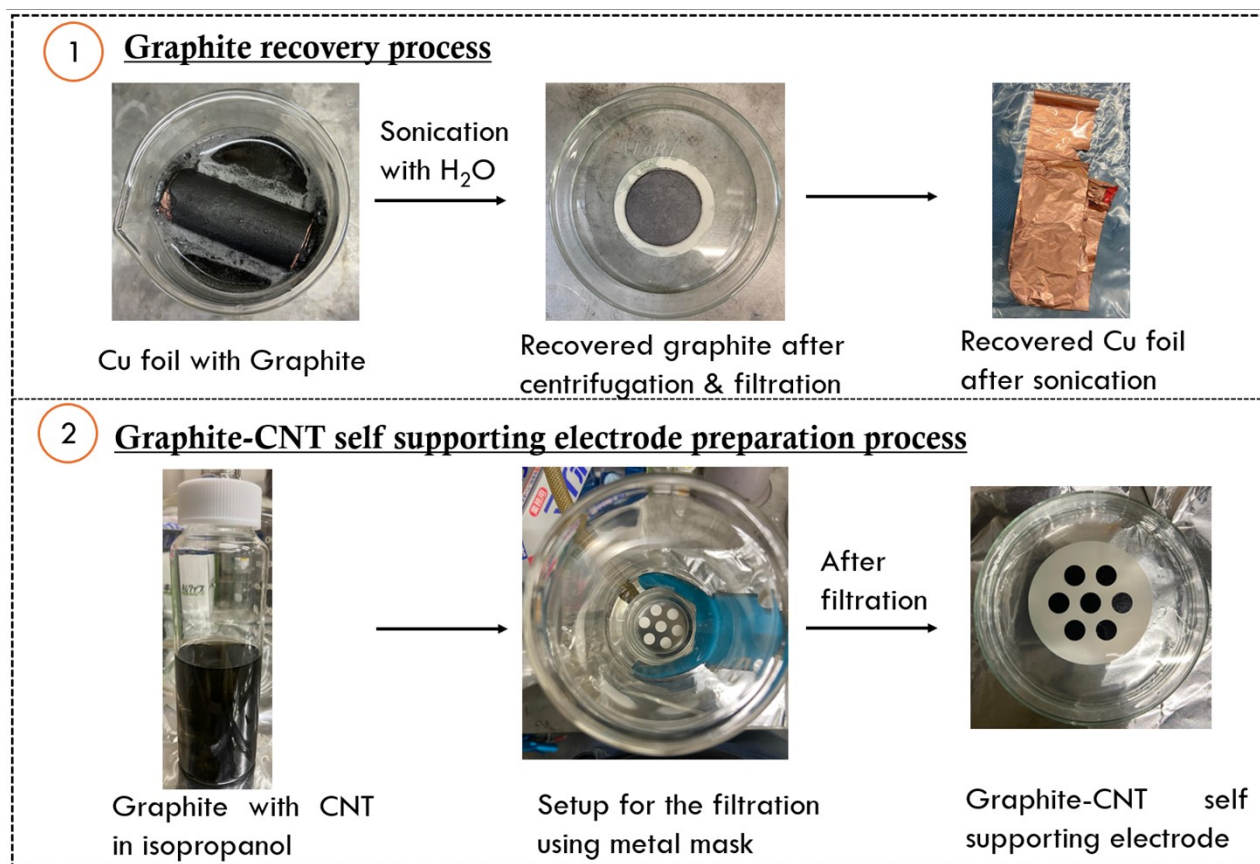

**Figure S4:** Photos illustrating the recovery of spent graphite from copper foil and the preparation of graphite-CNT self-supporting electrodes.

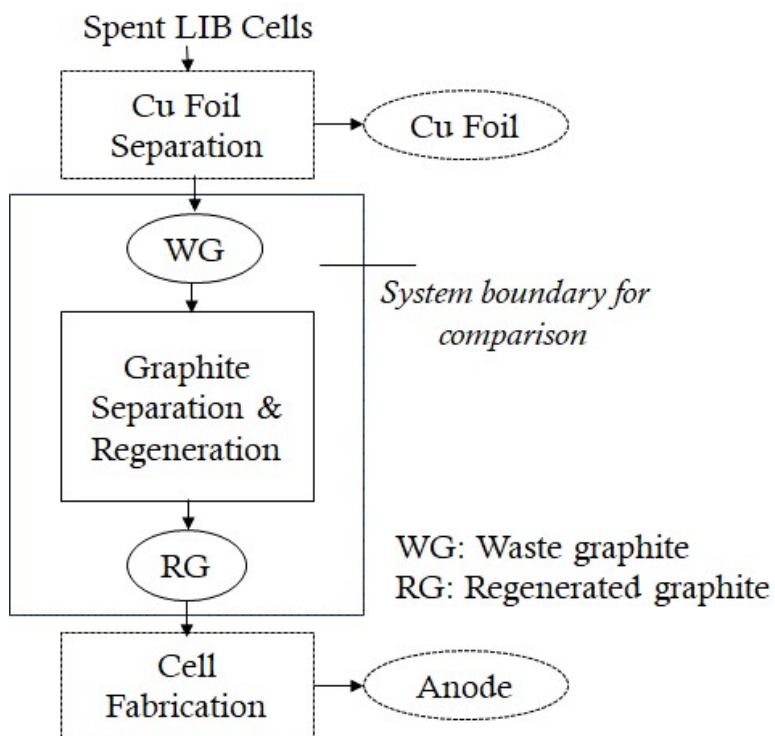

**Figure S5.** Gate-to-gate system boundary for comparing the environmental performance of graphite separation and activation alternatives in this study (dotted shapes are not included).

**Table S2.** Energy consumption of the laboratory-scale energy processing of 1 g graphite (unit: kWh<sub>electricity</sub>/1-g-graphite)

|                   |                    | Lab-actual <sup>1</sup> | Lab-ideal <sup>2</sup> | Lab equipment                                                                                                                          |
|-------------------|--------------------|-------------------------|------------------------|----------------------------------------------------------------------------------------------------------------------------------------|
| Gr-AcOH           | Heating & stirring | 0.02                    | 2.00E-04               | C-MAG HS 7 digital -IKA (heating temperature range = 50 – 500 °C; stirring capacity up to 10 L; stirring speed range = 100 – 1500 rpm) |
|                   | Drying             | 0.17                    | 9.91E-05 <sup>3</sup>  | AXEL GLOBAL AVO-200 SB (inner capacity upto 8 L; temperature range = 40 – 220 °C; heater capacity = 800 W)                             |
| Gr-KOH            | Stirring           | 0.01                    | 1.00E-04               | C-MAG HS 7 digital -IKA (heating temperature range = 50 – 500 °C; stirring capacity up to 10 L; stirring speed range = 100 – 1500 rpm) |
|                   | Annealing          | 0.57                    | 1.37E-03               | Asahi Rikagaku ARF-50K ceramic electric tubular reactor openable 700 W; Furnace diameter = φ51 mm; Maximum temperature = 1200 °C       |
|                   | Drying             | 0.17                    | 9.91E-05               | AXEL GLOBAL AVO-200 SB (inner capacity upto 8 L; temperature range = 40 – 220 °C; heater capacity = 800 W)                             |
| Gr-N <sub>2</sub> | Annealing          | 0.57                    | 1.37E-03               | Asahi Rikagaku ARF-50K ceramic electric tubular reactor openable 700 W; Furnace diameter = φ51 mm; Maximum temperature = 1200 °C       |
|                   | Drying             | 0.17                    | 9.91E-05               | AXEL GLOBAL AVO-200 SB (inner capacity upto 8 L; temperature range = 40 – 220 °C; heater capacity = 800 W)                             |

<sup>1</sup> Lab-actual is the electricity consumed in actual experiment measured using a clamp meter in a laboratory environment. Overestimation occurred because this is a batch process and the full capacity of the equipment is not used.

<sup>2</sup> Lab-ideal is estimated by normalizing electricity from “lab-actual” with ½ of the maximum treatment capacity of the equipment per batch.<sup>35</sup>

<sup>3</sup> Estimated based on the heat capacity and heat of water vaporization. A 10% water content in graphite and a 100 K temperature increase were assumed.



**Table S3.** Energy consumption of estimated pilot-scale processing of 100 kg graphite (unit: kWh<sub>electricity</sub>/100-kg-graphite).

|                         |                     | Pilot  | Pilot-scale equipment                                                                                          |
|-------------------------|---------------------|--------|----------------------------------------------------------------------------------------------------------------|
| <b>Gr-AcOH</b>          | Heating & stirring  | 0.673  | Sepro® leach reactor, SRL250 model for volumes up to 0.5 m <sup>3</sup> ; 3.7 kW <sup>35</sup>                 |
|                         | Drying <sup>1</sup> | 8.404  | BioLab® convection oven, PF 200 model for volumes up to 230 L; maximum temperature 300°C; 2.7 kW <sup>35</sup> |
| <b>Gr-KOH</b>           | Stirring            | 4.036  | Sepro® leach reactor, SRL250 model for volumes up to 0.5 m <sup>3</sup> ; 3.7 kW <sup>35</sup>                 |
|                         | Annealing           | 18.809 | BioLab® modified atmosphere chamber furnace, GPCMA/174 model for volumes up to 174 L; 36 kW <sup>35</sup>      |
|                         | Drying              | 8.404  | BioLab® convection oven, PF 200 model for volumes up to 230 L; maximum temperature 300°C; 2.7 kW <sup>35</sup> |
| <b>Gr-N<sub>2</sub></b> | Annealing           | 18.809 | BioLab® modified atmosphere chamber furnace, GPCMA/245 model for volumes up to 245 L; 45 kW <sup>35</sup>      |
|                         | Drying              | 8.404  | BioLab® convection oven, PF 200 model for volumes up to 230 L; maximum temperature 300°C; 2.7 kW <sup>35</sup> |

<sup>1</sup>The energy consumption for drying is calculated as follows:

The energy consumption of facility operation is:

$$2.7 \text{ kW} * 2 \text{ hr} * (100 \text{ kg-graphite}/2200 \text{ kg m}^{-3}) / (0.23 \text{ m}^3 \text{ reactor capacity} * \frac{1}{2} \text{ max allowed}) = 2.134 \text{ kWh}$$

The energy consumption of the vaporization of 10 kg of water from 100 kg of graphite was calculated as

$$2257 \text{ J/g} * 10 \text{ kg} = 6.270 \text{ kWh.}$$

The total energy consumption was therefore 2.134 kWh + 6.270 kWh = 8.404 kWh.

**Table S4.** Materials used in processing 1 kg graphite.

|                         |                 | Amount (kg) | Reference process from Ecoinvent                                                                                                  |
|-------------------------|-----------------|-------------|-----------------------------------------------------------------------------------------------------------------------------------|
| <b>Gr-AcOH</b>          | Acetic acid     | 0.18        | Market for acetic acid, without water, in 98% solution state   acetic acid, without water, in 98% solution state   Cutoff, U, GLO |
|                         | Deionized water | 19.00       | Market for water, deionised   water, deionised   Cutoff, U, RoW                                                                   |
| <b>Gr-KOH</b>           | KOH             | 1.18        | Market for potassium hydroxide   potassium hydroxide   Cutoff, U, GLO                                                             |
|                         | Deionized water | 19.10       | Market for water, deionised   water, deionised   Cutoff, U, RoW                                                                   |
|                         | Nitrogen gas    | 0.15        | Market for nitrogen, liquid   nitrogen, liquid   Cutoff, U, RoW                                                                   |
| <b>Gr-N<sub>2</sub></b> | Deionized water | 3.00        | Market for water, deionised   water, deionised   Cutoff, U, RoW                                                                   |
|                         | Nitrogen gas    | 0.15        | Market for nitrogen, liquid   nitrogen, liquid   Cutoff, U, RoW                                                                   |

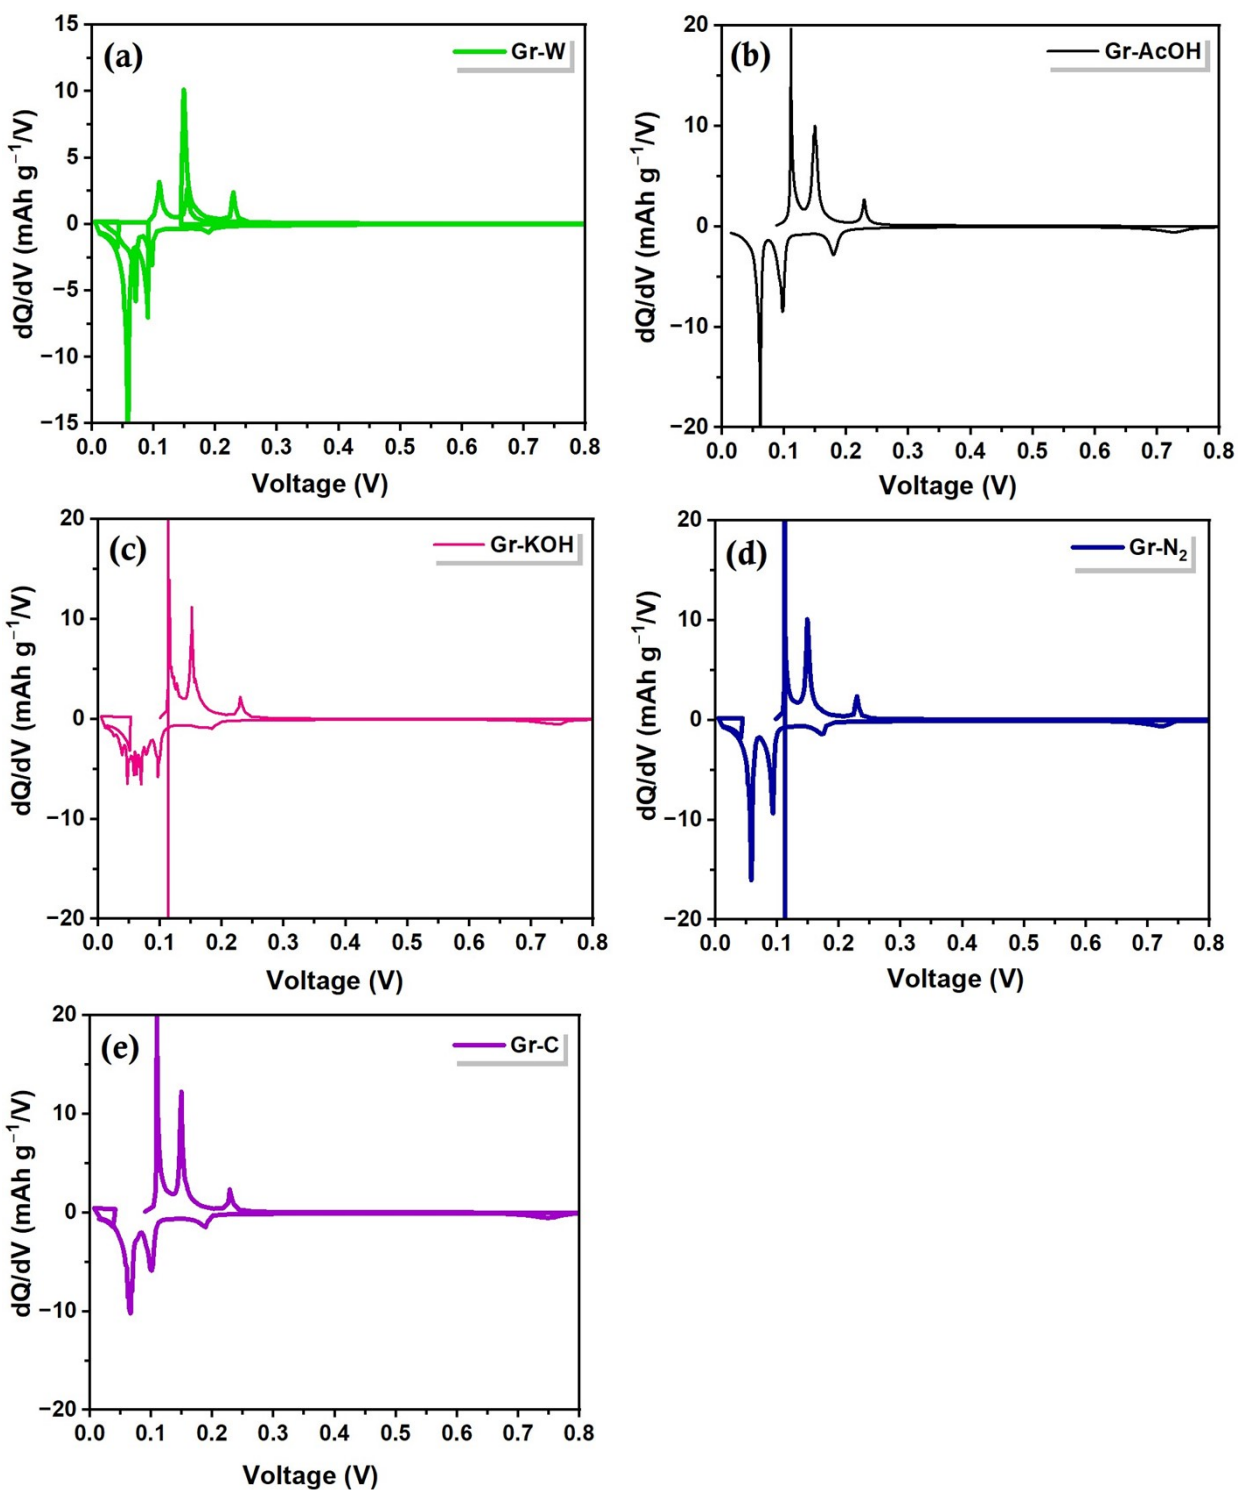

**Figure S6:**  $dq/dV$  analysis of the graphite half-cells (CNT-based electrodes). (a) Gr-W, (b) Gr-AcOH, (c) Gr-KOH, (d) Gr-N<sub>2</sub>, (e) Gr-C.

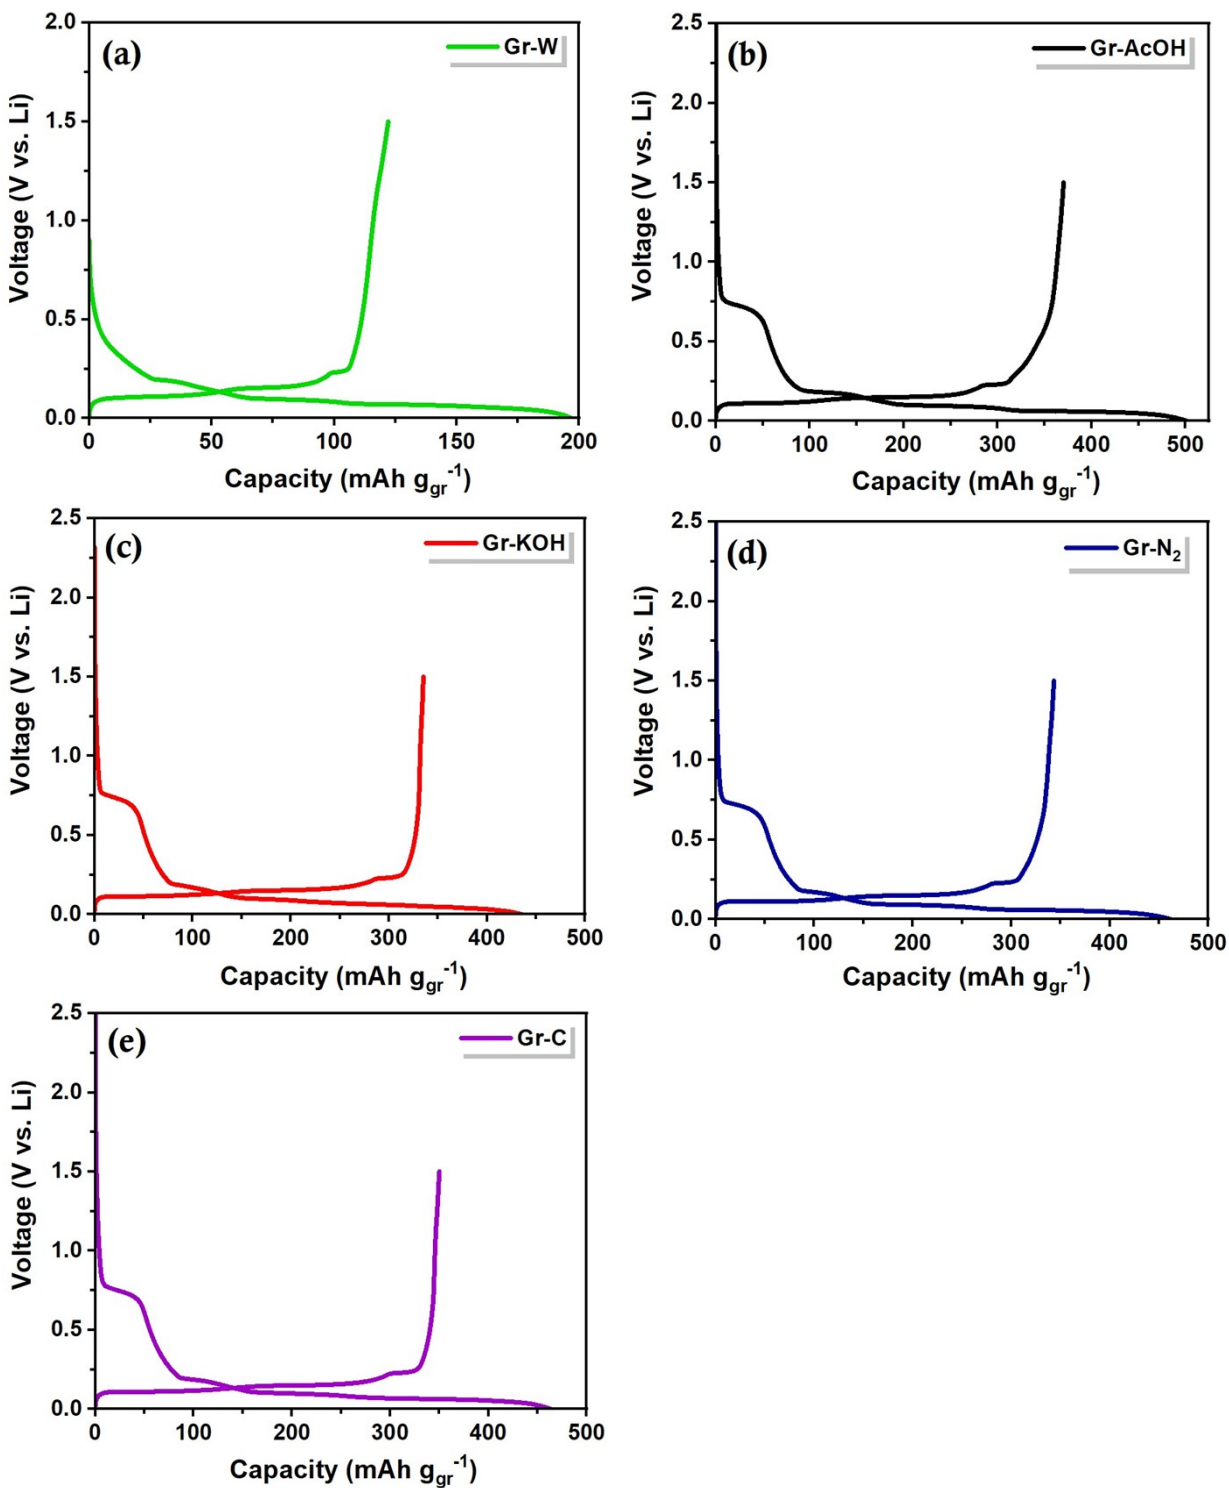

**Figure S7:** Initial lithiation-delithiation curves of the graphite half-cells (CNT-based electrodes). (a) Gr-W, (b) Gr-AcOH, (c) Gr-KOH, (d) Gr-N<sub>2</sub>, (e) Gr-C.

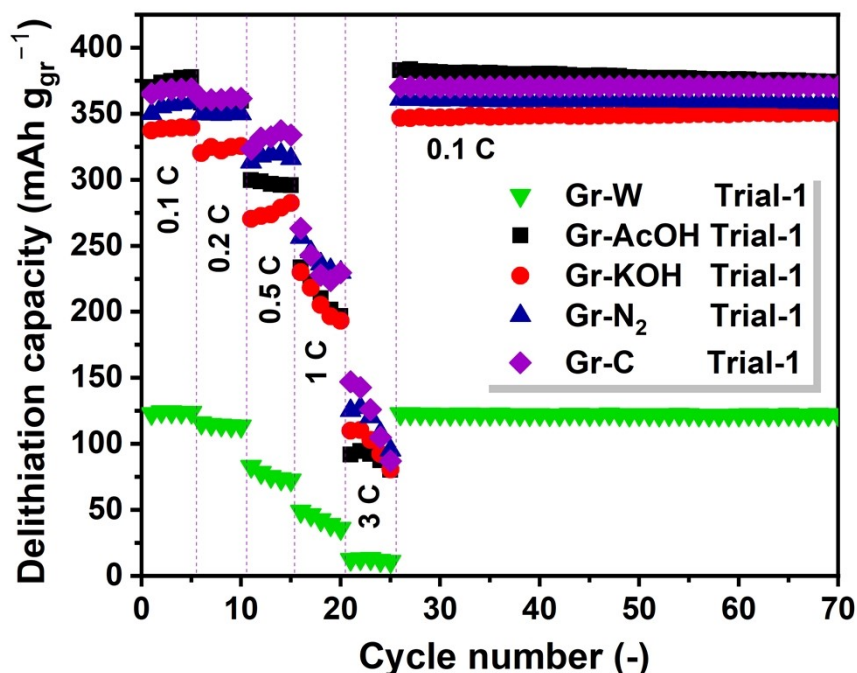

**Figure S8:** Repeatability of the rate performance of all graphite samples (CNT-based electrodes).

- Gr-W average delithiation capacities at 0.1C, 0.2 C, 0.5 C, 1C & 3 C = 123.8, 114.3, 76.4, 42.4 & 12.1 mAh g<sub>gr</sub><sup>-1</sup>, respectively
- Gr-AcOH average delithiation capacities at 0.1C, 0.2 C, 0.5 C, 1C & 3 C = 374.6, 359.1, 297.3, 212.8 & 89.2 mAh g<sub>gr</sub><sup>-1</sup>, respectively
- Gr-KOH average delithiation capacities at 0.1C, 0.2 C, 0.5 C, 1C & 3 C = 338.8, 323.4, 275.5, 208.6 & 99.2 mAh g<sub>gr</sub><sup>-1</sup>, respectively
- Gr-N<sub>2</sub> average delithiation capacities at 0.1C, 0.2 C, 0.5 C, 1C & 3 C = 355.7, 350, 317.1, 240, & 115.1 mAh g<sub>gr</sub><sup>-1</sup>, respectively
- Gr-C average delithiation capacities at 0.1C, 0.2 C, 0.5 C, 1C & 3 C = 367.7, 361.2, 331.6, 237.4 & 121.5 mAh g<sub>gr</sub><sup>-1</sup>, respectively

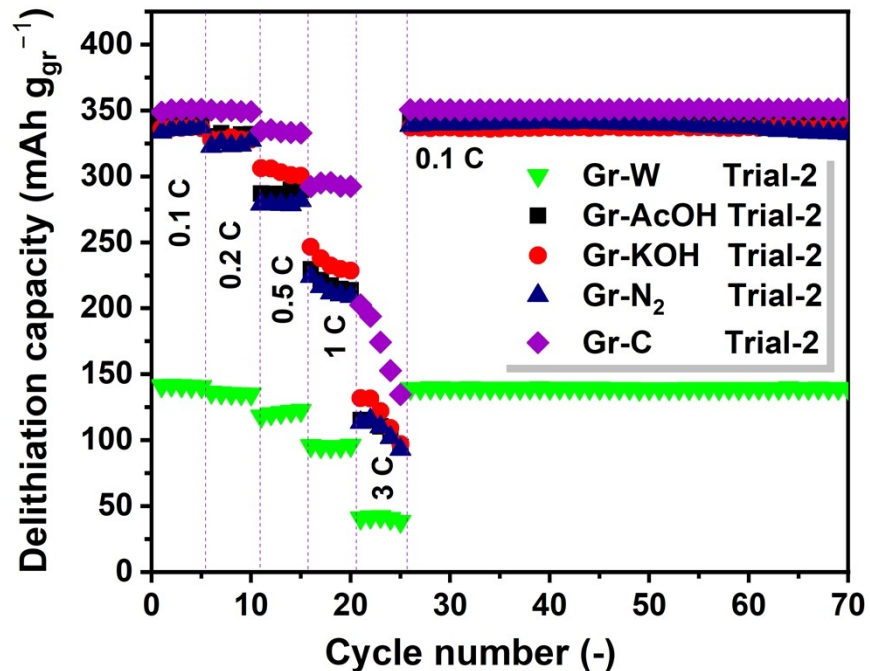

**Figure S9:** Repeatability of the rate performance of all graphite samples (CNT-based electrodes).

- Gr-W average delithiation capacities at 0.1C, 0.2 C, 0.5 C, 1C & 3 C = 141.1, 135.4, 120.6, 95.3 & 40.7 mAh g<sub>gr</sub><sup>-1</sup>, respectively
- Gr-AcOH average delithiation capacities at 0.1C, 0.2 C, 0.5 C, 1C & 3 C = 352.1, 341.4, 288.1, 219.3 & 107.8 mAh g<sub>gr</sub><sup>-1</sup>, respectively
- Gr-KOH average delithiation capacities at 0.1C, 0.2 C, 0.5 C, 1C & 3 C = 336.7, 328.4, 303.6, 235 & 118.3 mAh g<sub>gr</sub><sup>-1</sup>, respectively
- Gr-N<sub>2</sub> average delithiation capacities at 0.1C, 0.2 C, 0.5 C, 1C & 3 C = 335.7, 324.5, 279.4, 214.3 & 106.8 mAh g<sub>gr</sub><sup>-1</sup>, respectively
- Gr-C average delithiation capacities at 0.1C, 0.2 C, 0.5 C, 1C & 3 C = 350.3, 349.6, 334.0, 293.5, & 171.7 mAh g<sub>gr</sub><sup>-1</sup>, respectively

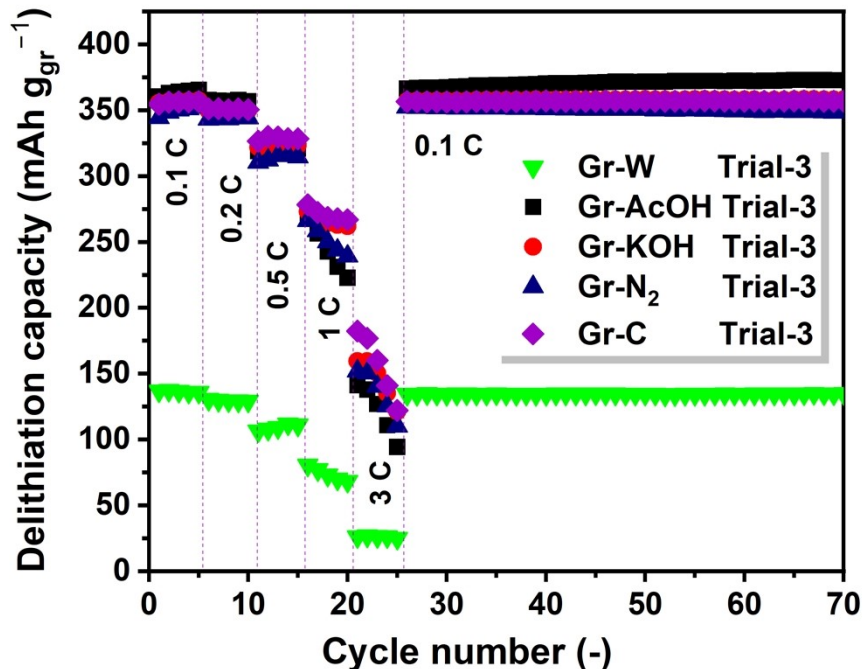

Figure S10: Repeatability of the rate performance of all graphite samples (CNT-based electrodes).

- Gr-W average delithiation capacities at 0.1C, 0.2 C, 0.5 C, 1C & 3 C = 136.4, 129.5, 109.2, 73.7, 26.0 mAh g<sub>gr</sub><sup>-1</sup>, respectively
- Gr-AcOH average delithiation capacities at 0.1C, 0.2 C, 0.5 C, 1C & 3 C = 363.6, 357.4, 321.6, 244.4, 122.2 mAh g<sub>gr</sub><sup>-1</sup>, respectively
- Gr-KOH average delithiation capacities at 0.1C, 0.2 C, 0.5 C, 1C & 3 C = 356.7, 349.8, 323.7, 266, 145.1 mAh g<sub>gr</sub><sup>-1</sup>, respectively
- Gr-N<sub>2</sub> average delithiation capacities at 0.1C, 0.2 C, 0.5 C, 1C & 3 C = 349.2, 343.9, 313.6, 251.6, 135.6 mAh g<sub>gr</sub><sup>-1</sup>, respectively
- Gr-C average delithiation capacities at 0.1C, 0.2 C, 0.5 C, 1C & 3 C = 356.0, 350.9, 328.6, 270.7, 156.4 mAh g<sub>gr</sub><sup>-1</sup>, respectively

**Table S5. Comparison of the rate performance of all three Gr-W graphite coin cells at each rate**

| Rate         | Gr-W 1 <sup>st</sup> coin cell<br>(mA h g <sub>gr</sub> <sup>-1</sup> ) | Gr-W 2 <sup>nd</sup> coin cell<br>(mA h g <sub>gr</sub> <sup>-1</sup> ) | Gr-W 3 <sup>rd</sup> coin cell<br>(mA h g <sub>gr</sub> <sup>-1</sup> ) |
|--------------|-------------------------------------------------------------------------|-------------------------------------------------------------------------|-------------------------------------------------------------------------|
| <b>0.1 C</b> | 123.8                                                                   | 141.1                                                                   | 136.4                                                                   |
| <b>0.2 C</b> | 114.3                                                                   | 135.4                                                                   | 129.5                                                                   |
| <b>0.5 C</b> | 76.4                                                                    | 120.6                                                                   | 109.2                                                                   |
| <b>1 C</b>   | 42.4                                                                    | 95.3                                                                    | 73.7                                                                    |
| <b>3 C</b>   | 12.1                                                                    | 40.7                                                                    | 26.0                                                                    |

\*Average capacities of all cells were calculated from five cycles at each rate.

**Table S6. Comparison of the rate performance of all three Gr-AcOH graphite coin cells at each rate.**

| Rate         | Gr-AcOH 1 <sup>st</sup> cell<br>(mA h g <sub>gr</sub> <sup>-1</sup> ) | Gr-AcOH 2 <sup>nd</sup> cell<br>(mA h g <sub>gr</sub> <sup>-1</sup> ) | Gr-AcOH 3 <sup>rd</sup> cell<br>(mA h g <sub>gr</sub> <sup>-1</sup> ) |
|--------------|-----------------------------------------------------------------------|-----------------------------------------------------------------------|-----------------------------------------------------------------------|
| <b>0.1 C</b> | 374.6                                                                 | 352.1                                                                 | 363.6                                                                 |
| <b>0.2 C</b> | 359.1                                                                 | 341.4                                                                 | 357.4                                                                 |
| <b>0.5 C</b> | 297.3                                                                 | 288.1                                                                 | 321.6                                                                 |
| <b>1 C</b>   | 212.8                                                                 | 219.3                                                                 | 244.4                                                                 |
| <b>3 C</b>   | 89.2                                                                  | 107.8                                                                 | 122.2                                                                 |

\*Average capacities of all cells were calculated from five cycles at each rate.

**Table S7. Comparison of the rate performance of all three Gr-KOH graphite coin cells at each rate.**



| Rate  | Gr-KOH 1 <sup>st</sup> cell<br>(mA h g <sub>gr</sub> <sup>-1</sup> ) | Gr-KOH 2 <sup>nd</sup> cell<br>(mA h g <sub>gr</sub> <sup>-1</sup> ) | Gr-KOH 3 <sup>rd</sup> cell<br>(mA h g <sub>gr</sub> <sup>-1</sup> ) |
|-------|----------------------------------------------------------------------|----------------------------------------------------------------------|----------------------------------------------------------------------|
| 0.1 C | 338.8                                                                | 336.7                                                                | 356.7                                                                |
| 0.2 C | 323.4                                                                | 328.4                                                                | 349.8                                                                |
| 0.5 C | 275.5                                                                | 303.6                                                                | 323.7                                                                |
| 1 C   | 208.6                                                                | 235                                                                  | 266                                                                  |
| 3 C   | 99.2                                                                 | 118.3                                                                | 145.1                                                                |

\*Average capacities of all cells were calculated from five cycles at each rate.

**Table S8. Comparison of the rate performance of all three Gr-N<sub>2</sub> graphite coin cells at each rate**

| Rate  | Gr-N <sub>2</sub> 1 <sup>st</sup> coin cell<br>(mA h g <sub>gr</sub> <sup>-1</sup> ) | Gr-N <sub>2</sub> 2 <sup>nd</sup> coin cell<br>(mA h g <sub>gr</sub> <sup>-1</sup> ) | Gr-N <sub>2</sub> 3 <sup>rd</sup> coin cell<br>(mA h g <sub>gr</sub> <sup>-1</sup> ) |
|-------|--------------------------------------------------------------------------------------|--------------------------------------------------------------------------------------|--------------------------------------------------------------------------------------|
| 0.1 C | 355.7                                                                                | 335.7                                                                                | 349.2                                                                                |
| 0.2 C | 350.0                                                                                | 324.5                                                                                | 343.9                                                                                |
| 0.5 C | 317.1                                                                                | 279.4                                                                                | 313.6                                                                                |
| 1 C   | 240.0                                                                                | 214.3                                                                                | 251.6                                                                                |
| 3 C   | 115.1                                                                                | 106.8                                                                                | 135.6                                                                                |

\*Average capacities of all cells were calculated from five cycles at each rate.

**Table S9. Comparison of the rate performance of all three Gr-C graphite coin cells at each rate**

| Rate         | Gr-C 1 <sup>st</sup> coin cell<br>(mA h g <sub>gr</sub> <sup>-1</sup> ) | Gr-C 2 <sup>nd</sup> coin cell<br>(mA h g <sub>gr</sub> <sup>-1</sup> ) | Gr-C 3 <sup>rd</sup> coin cell<br>(mA h g <sub>gr</sub> <sup>-1</sup> ) |
|--------------|-------------------------------------------------------------------------|-------------------------------------------------------------------------|-------------------------------------------------------------------------|
| <b>0.1 C</b> | 367.7                                                                   | 350.3                                                                   | 356.0                                                                   |
| <b>0.2 C</b> | 361.2                                                                   | 349.6                                                                   | 350.9                                                                   |
| <b>0.5 C</b> | 331.6                                                                   | 334.0                                                                   | 328.6                                                                   |
| <b>1 C</b>   | 237.4                                                                   | 293.5                                                                   | 270.7                                                                   |
| <b>3 C</b>   | 121.5                                                                   | 171.7                                                                   | 156.4                                                                   |

**\*Average capacities of all cells were calculated from five cycles at each rate.**

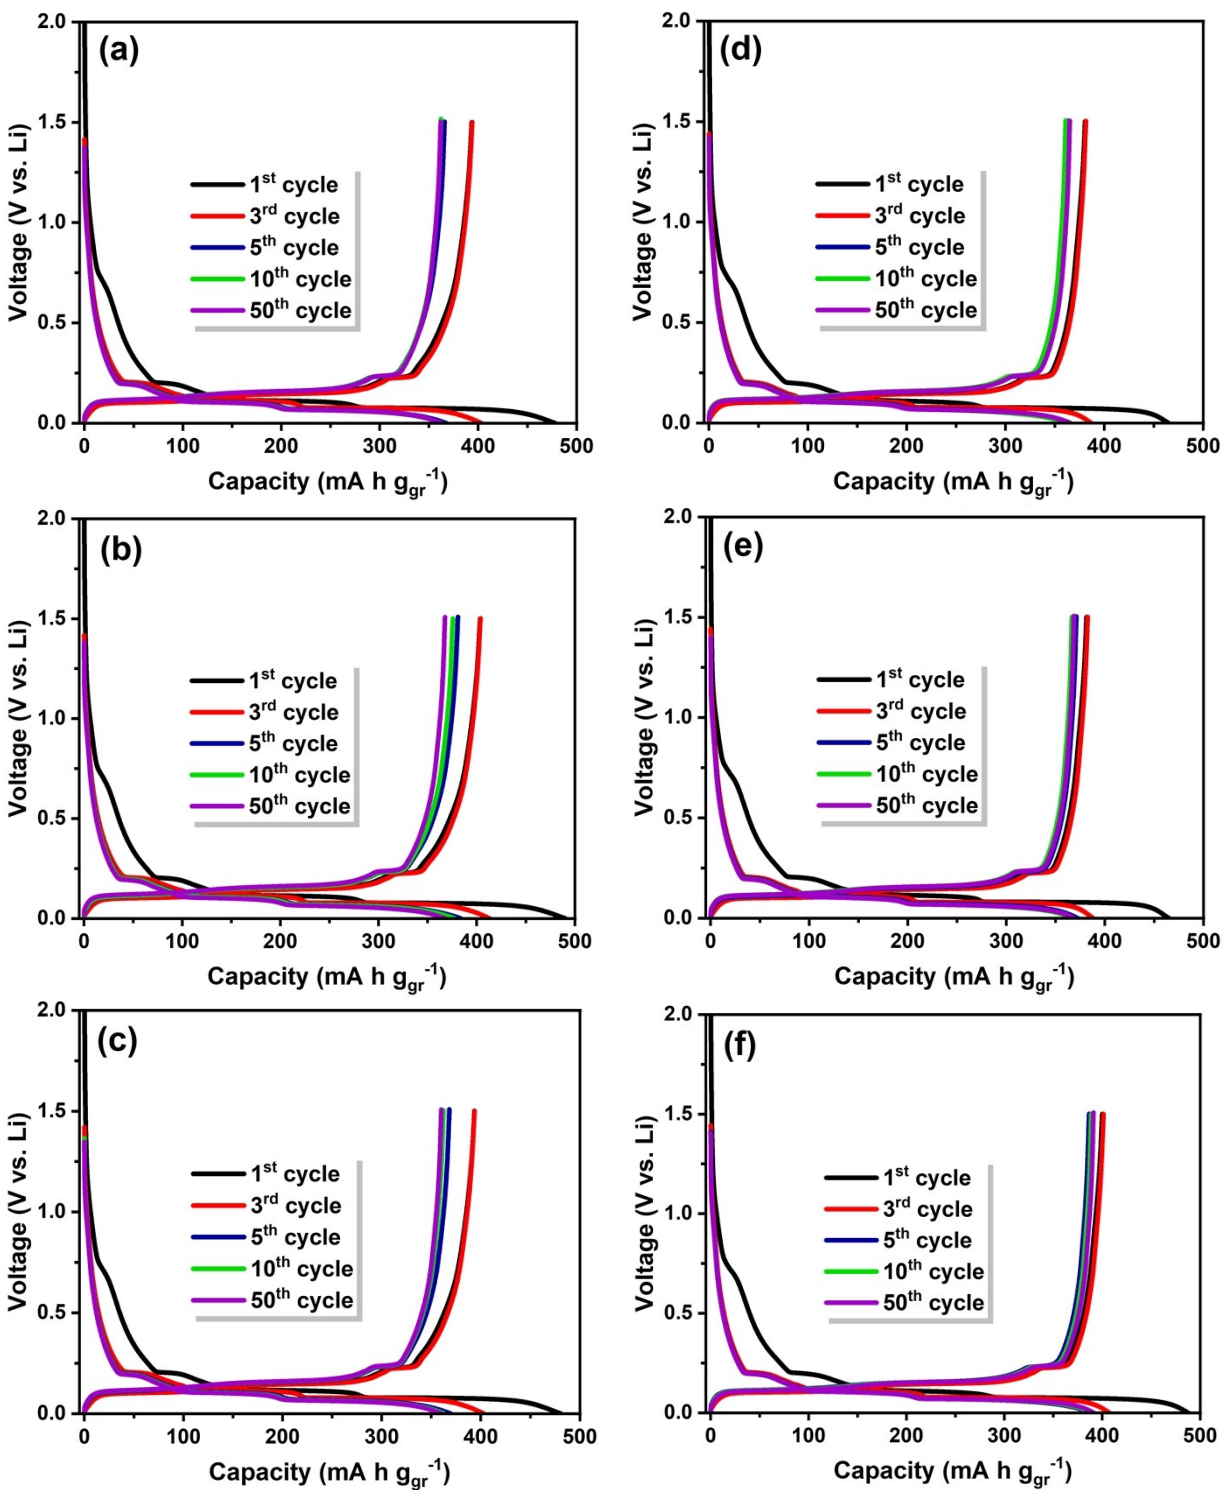

**Figure S11:** Lithiation-delithiation curves of the graphite half-cells (slurry-based electrodes). (a) Gr-N<sub>2</sub>\_cell-1, (b) Gr-N<sub>2</sub>\_cell-2, (c) Gr-N<sub>2</sub>\_cell-3, (d) Gr-C\_cell-1, (e) Gr-C\_cell-2, (f) Gr-C\_cell-3.

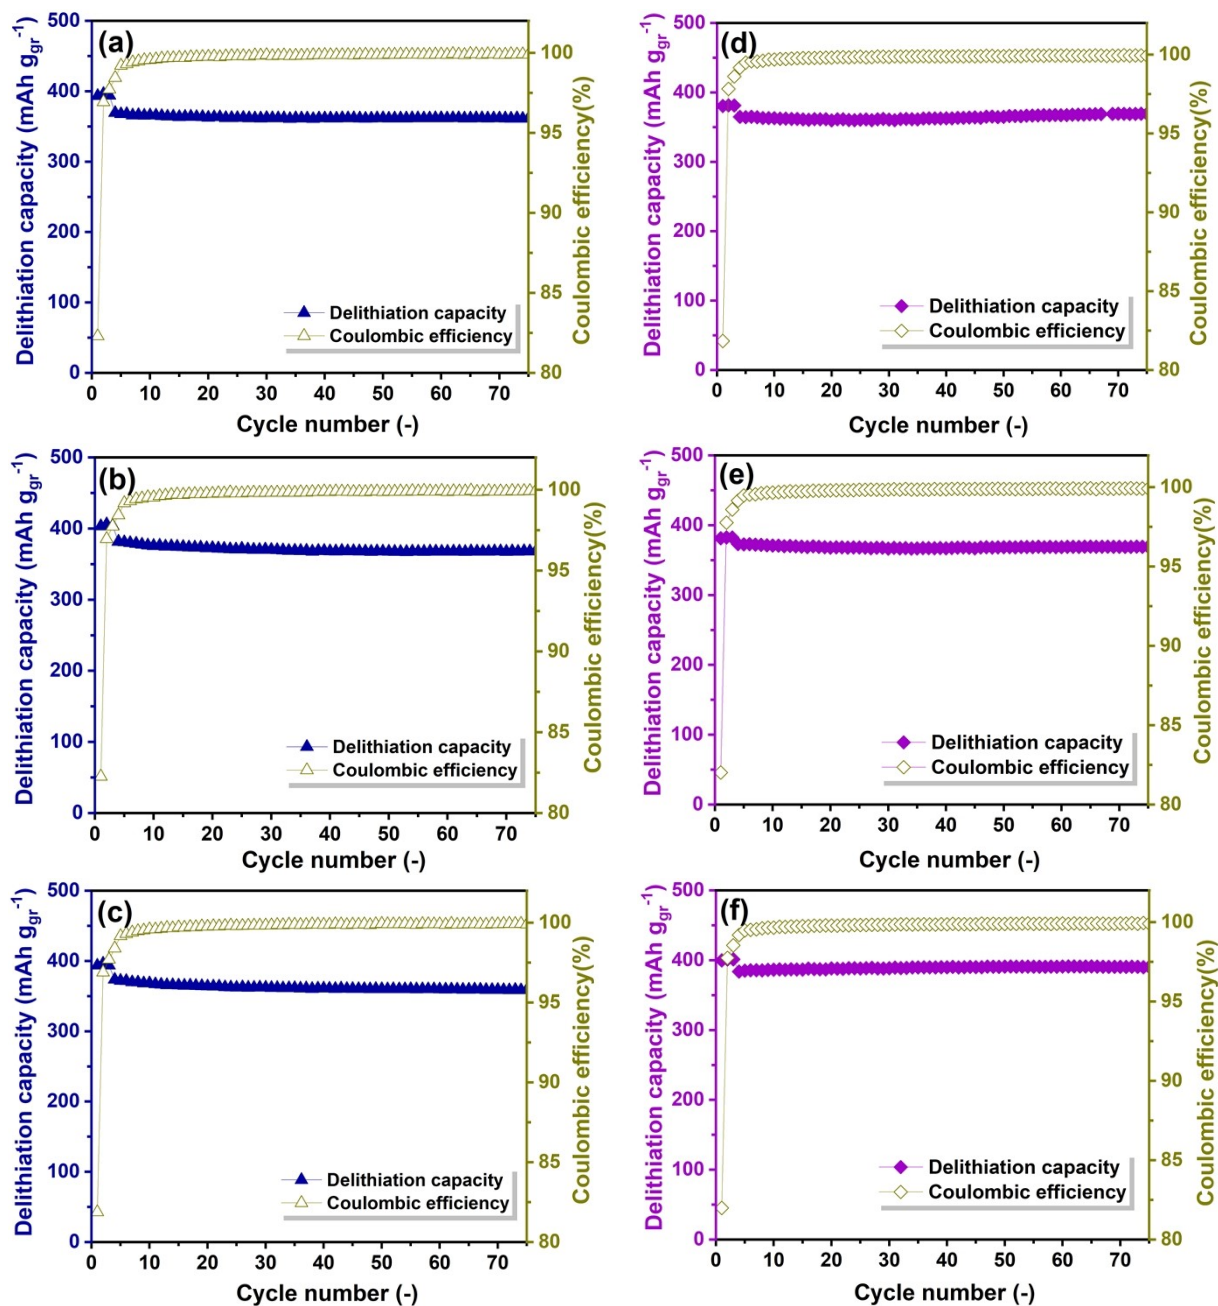

**Figure S12:** Cycling performance of the graphite half-cells (slurry-based electrodes). (a) Gr-N<sub>2</sub>\_cell-1, (b) Gr-N<sub>2</sub>\_cell-2, (c) Gr-N<sub>2</sub>\_cell-3, (d) Gr-C\_cell-1, (e) Gr-C\_cell-2, (f) Gr-C\_cell-3.

**Table S10:** Comparison of Regeneration Methods, Energy Consumption, Environmental Impact (Carbon Footprint), and Electrochemical Performance (Capacity and Cycle Retention) of Graphite Electrodes. Initial delithiation capacity and cycle performance show the average values of three cells for each treatment.

| Sample code                                      | Regeneration method                    | Regeneration conditions                                                                                                                                     | Energy consumption (kWh <sub>electricity</sub> /100-kg-graphite) | Environmental impact (kgCO <sub>2</sub> e/kg <sub>gr</sub> aphite) | Initial delithiation capacity (mAh g <sub>gr</sub> <sup>-1</sup> ) & Coulombic efficiency (%) | Cycle performance (75 <sup>th</sup> cycle capacity (mAh g <sub>gr</sub> <sup>-1</sup> ) & capacity retention (%)) |
|--------------------------------------------------|----------------------------------------|-------------------------------------------------------------------------------------------------------------------------------------------------------------|------------------------------------------------------------------|--------------------------------------------------------------------|-----------------------------------------------------------------------------------------------|-------------------------------------------------------------------------------------------------------------------|
| <b>CNT-based electrode fabrication method</b>    |                                        |                                                                                                                                                             |                                                                  |                                                                    |                                                                                               |                                                                                                                   |
| Gr-W                                             | -                                      | -                                                                                                                                                           | -                                                                | -                                                                  | 122 & 61.9                                                                                    | 128 & 105.2                                                                                                       |
| Gr-AcOH                                          | Acid treatment by organic acid         | 1 g of spent graphite + 3 mL of 1 M CH <sub>3</sub> COOH at 50 °C for 1 h with stirring                                                                     | 9.1 (for heating + stirring & drying)                            | 0.49                                                               | 370 & 73.7                                                                                    | 346 & 93.4                                                                                                        |
| Gr-KOH                                           | Alkali treatment followed by annealing | 1 g of spent graphite + 3 mL of 7 M KOH with stirring at room temperature for 6 h followed by an annealing at 800 °C under N <sub>2</sub> (1 L/min) for 1 h | 31.2 (for stirring, annealing & drying)                          | 3.53                                                               | 335 & 76.9                                                                                    | 332 & 99.1                                                                                                        |
| Gr-N <sub>2</sub>                                | Gas treatment under annealing          | 1 g of spent graphite annealed at 800 °C for 1 h under N <sub>2</sub> (1 L/min) followed by digested with 3 mL of deionized water                           | 27.2 (for annealing and drying)                                  | 0.27                                                               | 343 & 74.3                                                                                    | 343 & 100                                                                                                         |
| Gr-C                                             | Commercial graphite                    | N/A                                                                                                                                                         | N/A                                                              | N/A                                                                | 350 & 75.5                                                                                    | 350 & 99.9                                                                                                        |
| <b>Slurry-based electrode fabrication method</b> |                                        |                                                                                                                                                             |                                                                  |                                                                    |                                                                                               |                                                                                                                   |
| Gr-N <sub>2</sub>                                | Gas treatment under annealing          | 1 g of spent graphite annealed at 800 °C for 1 h under N <sub>2</sub> (1 L/min) followed by digested with 3 mL of deionized water                           | 27.2 (for annealing and drying)                                  | 0.27                                                               | 397 & 82                                                                                      | 363 & 91.4                                                                                                        |
| Gr-C                                             | Commercial graphite                    | N/A                                                                                                                                                         | N/A                                                              | N/A                                                                | 387 & 82                                                                                      | 376 & 97                                                                                                          |

**Table S11.** Contribution analysis of the global warming potential (GWP) of graphite recovery with the three methods at laboratory and pilot scales (unit: kgCO<sub>2</sub>e/kg-graphite).

|                         |                 | lab-actual <sup>1</sup> | lab-ideal <sup>2</sup> | pilot        |
|-------------------------|-----------------|-------------------------|------------------------|--------------|
| <b>Gr-AcOH</b>          | acetic acid     | 0.418                   | 0.418                  | 0.418        |
|                         | deionized water | 0.009                   | 0.009                  | 0.009        |
|                         | electricity     | 137.491                 | 0.216                  | 0.066        |
|                         | <b>TOTAL</b>    | <b>137.919</b>          | <b>0.644</b>           | <b>0.493</b> |
| <b>Gr-KOH</b>           | KOH             | 3.230                   | 3.230                  | 3.230        |
|                         | deionized water | 0.009                   | 0.009                  | 0.009        |
|                         | nitrogen gas    | 0.067                   | 0.067                  | 0.067        |
|                         | electricity     | 542.729                 | 3.230                  | 0.226        |
|                         | <b>TOTAL</b>    | <b>546.035</b>          | <b>4.445</b>           | <b>3.533</b> |
| <b>Gr-N<sub>2</sub></b> | deionized water | 0.001                   | 0.001                  | 0.001        |
|                         | nitrogen gas    | 0.067                   | 0.0067                 | 0.067        |
|                         | electricity     | 535.492                 | 1.067                  | 0.197        |
|                         | <b>TOTAL</b>    | <b>535.561</b>          | <b>1.135</b>           | <b>0.266</b> |

<sup>1</sup> the electricity requirement for laboratory equipment was measured without considering the maximum treatment capacity; overestimation was expected.

<sup>2</sup> the electricity requirement for laboratory equipment was calculated considering the treatment capacity (Table S7).

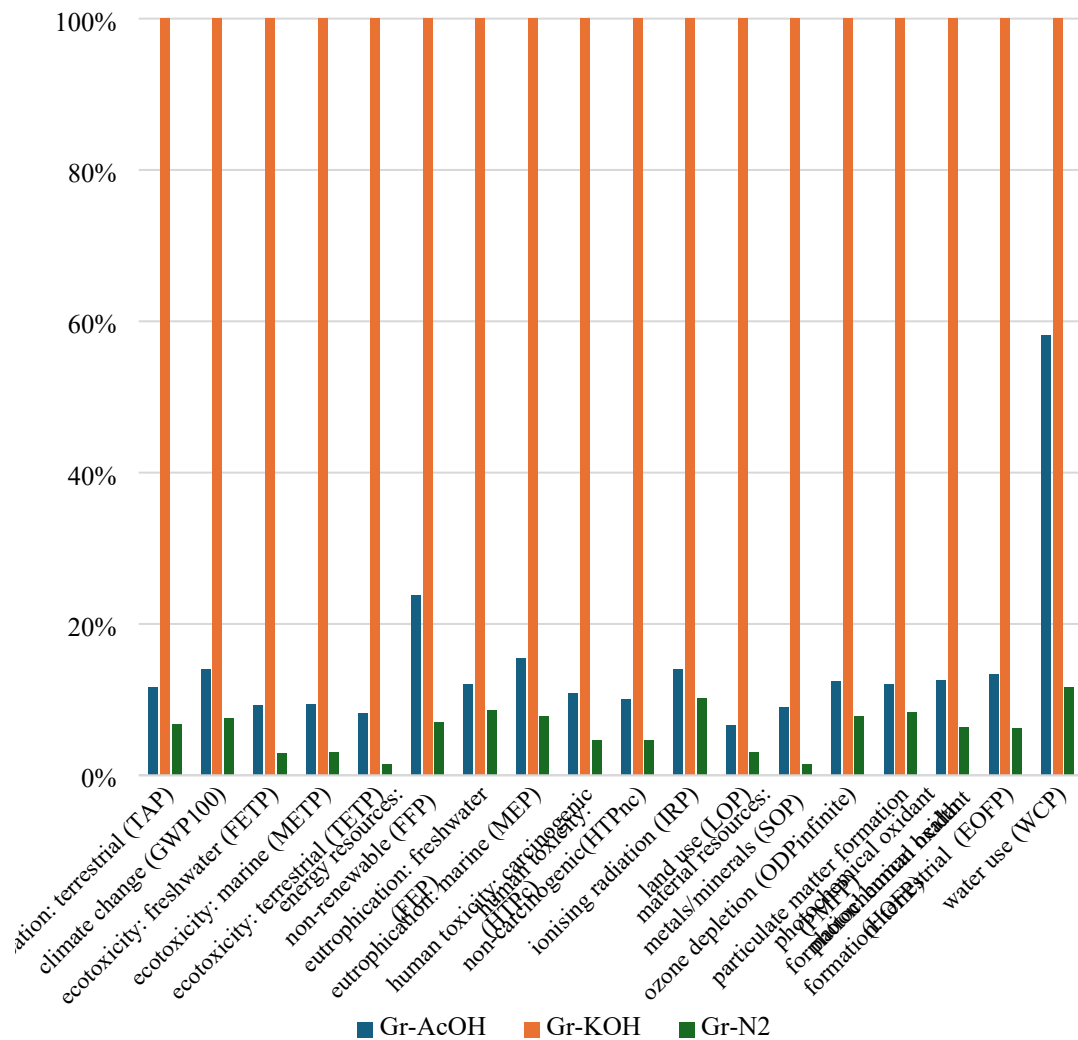

**Figure S13.** Comparison of all environmental indicators in ReCiPe 2016 LCIA methods on the pilot-scale of the three recycling methods. The result is normalized against Gr-KOH for easier comparison as Gr-AcOH and Gr-N<sub>2</sub> are lower than Gr-KOH.
